# Supplementary material for: CEM500K, a large-scale heterogeneous unlabeled cellular electron microscopy image dataset for deep learning
Source: eLife. 2021 Apr 8;10:e65894. doi: 10.7554/eLife.65894 (PMC8032397; doi:10.7554/eLife.65894)
Supplement: Figure 1—source data 1. [file elife-65894-fig1-data1.xlsx]

## Sheet: Fig1ac
Experiment	Imaging_Mode	Organism	Tissue origin
V4XFBZS88GW5	TEM	Human	Cervix
PTID8FIS5E4I	TEM	Human	Cervix
LN1A44R9FV9N	TEM	Human	Cervix
AD8ILTABJFOO	TEM	Human	Cervix
7SAXBX5E8LMU	TEM	Human	Cervix
KAIKZ4LF6B4E	TEM	Human	Cervix
8B0FVG3VDKSY	TEM	Human	Cervix
P5LZF7JZ4MWX	TEM	Human	Cervix
91M0BC3UQ1IS	TEM	Other Bacteria	N.A.
C03VXCNBK11H	TEM	Mouse	Muscle
RYPUJ94DJDJ8	TEM	Unknown	Unknown
9JT7932RF3RK	TEM	Unknown	Unknown
KEI22MX8T2HX	TEM	Unknown	Unknown
3YEXZ1S9SUU0	TEM	Unknown	Unknown
CDI828FIHCAQ	TEM	Unknown	Unknown
ENO8FB73GRZX	TEM	E. coli	N.A.
0SM6ADI98Y3F	TEM	E. coli	N.A.
R226KF4VGI4Y	TEM	E. coli	N.A.
LJM8P97XYBOW	TEM	C. elegans	Embryo
78QNYNI5EOVS	TEM	E. coli	N.A.
J3NFNUJI06QH	TEM	Rat	Salivary Gland
5XAJRPUZAAMT	TEM	Human	Monocyte
5Q5CPOV5J6LS	TEM	Mouse	Kidney
Q96RA63WQOKM	TEM	E. coli	N.A.
F9XLYPFQWR6K	TEM	Zebrafish	Eye
CGFATZMYKAW8	TEM	C. elegans	Embryo
18J71A7DDDBY	TEM	Human	Trachea
FFKRGWT36CQX	TEM	Zebrafish	Embryo
RVM0HQPCLZNC	TEM	C. elegans	Embryo
C04ACG1HS1VE	TEM	Human	Cervix
39L1Z140DS3H	TEM	Human	Skin
NK31WVUE3J8P	TEM	Human	Colon
ZQT59PUX3C8V	TEM	Human	Cervix
FSTGVH19L4VX	TEM	Unknown	Unknown
FBH4WELWY1T6	TEM	Unknown	Unknown
GBNTRWQYJDTJ	TEM	Unknown	Unknown
VUICQL0DQ9A2	FIBSEM	E. coli	N.A.
CK6V6QOH4MZP	FIBSEM	Other Bacteria	N.A.
V0Z3A0TQ84GN	FIBSEM	C. elegans	Embryo
MPEXURTPZPMZ	FIBSEM	C. elegans	N.A.
16FGBSSARW2B	FIBSEM	Other Eukaryotes	N.A.
3BJKY4PV8DJ0	FIBSEM	Drosophila	Kidney
82BFZ1OH1NQC	FIBSEM	C. elegans	Pharynx
0KNJP7AXQ872	FIBSEM	Human	Breast
STVECZOAX8LX	FIBSEM	Human	Colon
QY06GFLT3KTD	FIBSEM	Human	Eye
WX1EOR9GSTZZ	FIBSEM	Human	Kidney
KN17MZ0N5AO7	FIBSEM	Human	Kidney
SS3B4DF4FPBR	FIBSEM	Human	Lymphocyte
FI14OY2WHIS1	FIBSEM	Human	Lymphocyte
4Q1CHUFBG5V1	FIBSEM	Human	Lymphocyte
KWRQUZQYFYEO	FIBSEM	Human	Lymphocyte
982VCQOY64QI	FIBSEM	Human	Monocyte
KLTRRMP4CLZ0	FIBSEM	Human	Monocyte
4OHCE6WGO2PJ	FIBSEM	Human	Skin
L6GICWWTTA8G	FIBSEM	Human	Skin
L9V3R7ZQFROQ	FIBSEM	Human	Skin
5ISNFDGA62J0	FIBSEM	Human	Trachea
NG41RQ837VSI	FIBSEM	Mouse	Embryo
41LJ23I5KFGG	FIBSEM	Mouse	Embryo
LSG2ILK68JFO	FIBSEM	Mouse	Kidney
AS9C5VKPWP0N	FIBSEM	Mouse	Lung
JP9ZM6O5UB7Q	FIBSEM	Mouse	Lymphocyte
ABWSY1RY3PG4	FIBSEM	Mouse	Monocyte
WIQGAU866P8M	FIBSEM	Rat	Salivary Gland
B0UIZUCUBUAG	FIBSEM	Other Eukaryotes	N.A.
VOZ5UXTW50E7	FIBSEM	Zebrafish	Eye
aarnet	SBFSEM	Rat	Heart
bhatla	ssTEM	C. elegans	N.A.
bloss18	ssTEM	Mouse	Brain
bock11	ssTEM	Mouse	Brain
bumbarger13	ssTEM	C. elegans	Brain
busse16	SBFSEM	Other Eukaryotes	Spinning organ
cali18	FIBSEM	Mouse	Brain
cil_micro3632	ET	Human	N.A.
cil_micro6355	TEM	Human	N.A.
cil_micro8483	ET	Rat	Brain
cil_micro8641	ET	Rat	Brain
cil_project20099	SBEM	Other Bacteria	N.A.
cil_micro6023	TEM	Other Eukaryotes	Kidney
collman15	AT-SEM	Mouse	Brain
cremi	ssTEM	Drosophila	Brain
empiar10055	SBFSEM	Other Eukaryotes	N.A.
empiar10310	FIBSEM	Other Eukaryotes	N.A.
empiar10311	FIBSEM	Human	N.A.
empiar10324	FIBSEM	Other Bacteria	N.A.
empiar10327	FIBSEM	Other Bacteria	N.A.
guay20	SBFSEM	Human	N.A.
helmstaedter11	SBFSEM	Mouse	Brain
hildebrand17	ssSEM	Zebrafish	Brain
kasthuri15	AT-SEM	Mouse	Brain
kharris15	STEM	Rat	Brain
lee16	ssTEM	Mouse	Brain
lucchi12	FIBSEM	Drosophila	Brain
moscheni19	cryo-SXT	Human	Colon
perez14	SBEM	Mouse	Brain
segem15	SBEM	Mouse	Brain
urocell20	FIBSEM	Mouse	Bladder
xu17_fly	FIBSEM	Drosophila	Brain
xu17_mouse	FIBSEM	Mouse	Brain
xu17_cr	FIBSEM	Other Eukaryotes	N.A.
xu17_ofly	FIBSEM	Drosophila	Brain

## Sheet: Fig1b
Volume_source	X-resolution			Note:
INHOUSE	2			251 datasets from INHOUSE experiments and then 35 from external experiments;
cil_micro6023	2			many external experiments have multiple data volumes (in total they add to 340);
kharris15	2			however, they are ROIs from the same 3D dataset and as such have only a single resolution to count
collman15	2.23
kasthuri15	3
INHOUSE	4
bloss18	4
bock11	4
cremi	4
hildebrand17	4
lee16	4
perez14	4
lucchi12	5
urocell20	5.5
INHOUSE	6
empiar10055	8
empiar10311	8
xu17_fly	8
aarnet	10
cali18	10
cil_micro8483	10
empiar10310	10
empiar10324	10
empiar10327	10
guay20	10
helmstaedter11	12
moscheni19	12
segem15	12
INHOUSE	15.998
INHOUSE	15.9985
INHOUSE	15.9985
INHOUSE	15.9987
INHOUSE	15.999
INHOUSE	15.9993
INHOUSE	15.9993
INHOUSE	15.9993
INHOUSE	15.9994
INHOUSE	15.9995
INHOUSE	15.9996
INHOUSE	15.9998
INHOUSE	16.0005
INHOUSE	16.0006
INHOUSE	16.0006
INHOUSE	16.001
INHOUSE	16.0012
INHOUSE	16.0028
INHOUSE	16.0029
INHOUSE	17.8836
INHOUSE	17.8864
INHOUSE	17.8864
INHOUSE	17.995
INHOUSE	17.9962
INHOUSE	17.9967
INHOUSE	17.9971
INHOUSE	17.9971
INHOUSE	17.9973
INHOUSE	17.9974
INHOUSE	17.9974
INHOUSE	17.9974
INHOUSE	17.9974
INHOUSE	17.9974
INHOUSE	17.9977
INHOUSE	17.9977
INHOUSE	17.9977
INHOUSE	17.9977
INHOUSE	17.9977
INHOUSE	17.9978
INHOUSE	17.9978
INHOUSE	17.9978
INHOUSE	17.9984
INHOUSE	17.9985
INHOUSE	17.9985
INHOUSE	17.9985
INHOUSE	17.9985
INHOUSE	17.9985
INHOUSE	17.9985
INHOUSE	17.9986
INHOUSE	17.9986
INHOUSE	17.9986
INHOUSE	17.9986
INHOUSE	17.9986
INHOUSE	17.9987
INHOUSE	17.9988
INHOUSE	17.9992
INHOUSE	17.9992
INHOUSE	17.9992
INHOUSE	17.9992
INHOUSE	17.9992
INHOUSE	17.9992
INHOUSE	17.9992
INHOUSE	17.9992
INHOUSE	17.9992
INHOUSE	17.9992
INHOUSE	17.9995
INHOUSE	17.9995
INHOUSE	17.9996
INHOUSE	17.9996
INHOUSE	17.9997
INHOUSE	17.9998
INHOUSE	17.9998
INHOUSE	17.9998
INHOUSE	17.9998
INHOUSE	17.9998
INHOUSE	17.9998
INHOUSE	17.9998
INHOUSE	17.9998
INHOUSE	17.9998
INHOUSE	18
INHOUSE	18
INHOUSE	18
INHOUSE	18
INHOUSE	18
INHOUSE	18.0002
INHOUSE	18.0002
INHOUSE	18.0002
INHOUSE	18.0002
INHOUSE	18.0002
INHOUSE	18.0003
INHOUSE	18.0003
INHOUSE	18.0003
INHOUSE	18.0003
INHOUSE	18.0003
INHOUSE	18.0003
INHOUSE	18.0003
INHOUSE	18.0003
INHOUSE	18.0003
INHOUSE	18.0003
INHOUSE	18.0003
INHOUSE	18.0003
INHOUSE	18.0003
INHOUSE	18.0003
INHOUSE	18.0004
INHOUSE	18.0004
INHOUSE	18.0004
INHOUSE	18.0005
INHOUSE	18.0005
INHOUSE	18.0005
INHOUSE	18.0005
INHOUSE	18.0006
INHOUSE	18.0006
INHOUSE	18.0011
INHOUSE	18.0011
INHOUSE	18.0011
INHOUSE	18.0011
INHOUSE	18.0011
INHOUSE	18.0011
INHOUSE	18.0011
INHOUSE	18.0011
INHOUSE	18.0011
INHOUSE	18.0011
INHOUSE	18.0011
INHOUSE	18.0011
INHOUSE	18.0011
INHOUSE	18.0011
INHOUSE	18.0011
INHOUSE	18.0011
INHOUSE	18.0011
INHOUSE	18.0011
INHOUSE	18.0011
INHOUSE	18.0011
INHOUSE	18.0011
INHOUSE	18.0011
INHOUSE	18.0011
INHOUSE	18.0011
INHOUSE	18.0011
INHOUSE	18.0013
INHOUSE	18.0013
INHOUSE	18.0013
INHOUSE	18.0013
INHOUSE	18.0013
INHOUSE	18.0013
INHOUSE	18.0013
INHOUSE	18.0013
INHOUSE	18.0017
INHOUSE	18.0017
INHOUSE	18.0017
INHOUSE	18.0017
INHOUSE	18.0017
INHOUSE	18.0017
INHOUSE	18.0017
INHOUSE	18.0018
INHOUSE	18.0018
INHOUSE	18.0018
INHOUSE	18.0019
INHOUSE	18.002
INHOUSE	18.002
INHOUSE	18.0024
INHOUSE	18.0024
INHOUSE	18.0031
INHOUSE	18.0032
INHOUSE	18.0034
INHOUSE	18.0034
INHOUSE	18.0038
INHOUSE	18.0038
INHOUSE	18.3818
INHOUSE	19.9964
INHOUSE	19.9965
INHOUSE	19.997
INHOUSE	19.9992
INHOUSE	19.9999
INHOUSE	20
INHOUSE	20.0014
INHOUSE	20.0019
INHOUSE	20.0023
INHOUSE	20.0023
INHOUSE	20.0026
INHOUSE	20.0026
INHOUSE	20.0027
INHOUSE	20.0036
INHOUSE	20.0037
INHOUSE	20.0037
cil_micro3632	22.5
INHOUSE	23.9971
INHOUSE	23.9971
INHOUSE	23.9975
INHOUSE	23.9977
INHOUSE	23.9977
INHOUSE	23.9985
INHOUSE	23.9985
INHOUSE	23.999
INHOUSE	23.9994
INHOUSE	24.0011
INHOUSE	24.0015
INHOUSE	24.0015
INHOUSE	24.0015
INHOUSE	29.9916
INHOUSE	29.9956
INHOUSE	29.9957
INHOUSE	29.9962
INHOUSE	29.9962
INHOUSE	29.9968
INHOUSE	29.9969
INHOUSE	29.9972
INHOUSE	29.999
INHOUSE	29.9997
INHOUSE	29.9998
INHOUSE	30.0002
INHOUSE	30.0005
INHOUSE	30.0005
INHOUSE	30.0005
INHOUSE	30.001
INHOUSE	30.0021
INHOUSE	30.0029
INHOUSE	30.0029
INHOUSE	30.0034
INHOUSE	30.0034
INHOUSE	30.0034
INHOUSE	30.0037
INHOUSE	30.0037
INHOUSE	30.0039
INHOUSE	30.0045
INHOUSE	30.0054
INHOUSE	30.0054
INHOUSE	30.0054
INHOUSE	30.0056
INHOUSE	30.0056
INHOUSE	30.0057
INHOUSE	30.0057
INHOUSE	30.0096
INHOUSE	35.9931
INHOUSE	35.9942
INHOUSE	35.9984
INHOUSE	35.9984
INHOUSE	35.9984
INHOUSE	35.9984
INHOUSE	35.9984
INHOUSE	35.9984
INHOUSE	35.9984
INHOUSE	35.9984
INHOUSE	35.9984
INHOUSE	35.9984
INHOUSE	36.0016
INHOUSE	36.0027
INHOUSE	36.0058
INHOUSE	36.0097
cil_project20099	60
INHOUSE	60.0173
INHOUSE	80.0049
bhatla	Unk
bumbarger13	Unk
busse16	Unk
cil_micro6355	Unk
cil_micro8641	Unk
xu17_mouse	Unk
xu17_cr	Unk
xu17_ofly	Unk
