# Supplementary material for: CEM500K, a large-scale heterogeneous unlabeled cellular electron microscopy image dataset for deep learning
Source: eLife. 2021 Apr 8;10:e65894. doi: 10.7554/eLife.65894 (PMC8032397; doi:10.7554/eLife.65894)
Supplement: Figure 2—source data 1. [file elife-65894-fig2-data1.xlsx]

## Sheet: Fig2ce
Benchmark	EM Dataset	IoU	Percent_Bloss
All Mito.	Random Init. (No Pretraining)	0.30637	-0.562465
CREMI S.C.	Random Init. (No Pretraining)	0	-1
Guay	Random Init. (No Pretraining)	0.34904	-0.0802974
Kasthuri++	Random Init. (No Pretraining)	0.855477	-0.0563166
Lucchi++	Random Init. (No Pretraining)	0.787761	-0.123327
Perez	Random Init. (No Pretraining)	0.546747	-0.393452
UroCell	Random Init. (No Pretraining)	0.20834	-0.691245
All Mito.	Bloss et al. 2018	0.700218	0
CREMI S.C.	Bloss et al. 2018	0.24241	0
Guay	Bloss et al. 2018	0.379514	0
Kasthuri++	Bloss et al. 2018	0.90653	0
Lucchi++	Bloss et al. 2018	0.89858	0
Perez	Bloss et al. 2018	0.901408	0
UroCell	Bloss et al. 2018	0.674775	0
All Mito.	CEMraw	0.722424	0.031713
CREMI S.C.	CEMraw	0.25379	0.0469453
Guay	CEMraw	0.37229	-0.0190349
Kasthuri++	CEMraw	0.91304	0.00718123
Lucchi++	CEMraw	0.88028	-0.0203655
Perez	CEMraw	0.884995	-0.0182076
UroCell	CEMraw	0.68384	0.0134341
All Mito.	CEMdedup	0.725834	0.0365829
CREMI S.C.	CEMdedup	0.25887	0.0679015
Guay	CEMdedup	0.390852	0.0298751
Kasthuri++	CEMdedup	0.91268	0.00678411
Lucchi++	CEMdedup	0.89015	-0.00938147
Perez	CEMdedup	0.89465	-0.00749661
UroCell	CEMdedup	0.73814	0.0939054
All Mito.	CEM500K	0.7496	0.0705238
CREMI S.C.	CEM500K	0.26458	0.0914566
Guay	CEM500K	0.403952	0.0643929
Kasthuri++	CEM500K	0.9153	0.00967425
Lucchi++	CEM500K	0.89377	-0.00535289
Perez	CEM500K	0.89387	-0.00836192
UroCell	CEM500K	0.768005	0.138165

## Sheet: Fig2d
Benchmark	EM Dataset	IoU	Percent
All Mito.	CEMraw	0.722424	3.76178
CREMI S.C.	CEMraw	0.25379	4.25155
Guay	CEMraw	0.37229	8.50466
Kasthuri++	CEMraw	0.91304	0.247525
Lucchi++	CEMraw	0.88028	1.53247
Perez	CEMraw	0.884995	1.00283
UroCell	CEMraw	0.68384	12.3077
All Mito.	CEMdedup	0.725834	3.2743
CREMI S.C.	CEMdedup	0.25887	2.20574
Guay	CEMdedup	0.390852	3.35165
Kasthuri++	CEMdedup	0.91268	0.287067
Lucchi++	CEMdedup	0.89015	0.406673
Perez	CEMdedup	0.89465	-0.0871849
UroCell	CEMdedup	0.73814	4.04598
All Mito.	CEM500K	0.7496	0
CREMI S.C.	CEM500K	0.26458	0
Guay	CEM500K	0.403952	0
Kasthuri++	CEM500K	0.9153	0
Lucchi++	CEM500K	0.89377	0
Perez	CEM500K	0.89387	0
UroCell	CEM500K	0.768005	0

## Sheet: Table1
	Benchmark	Random Init. (No Pretraining)	Bloss et al. 2018	CEMraw	CEMdedup	CEM500K
	All Mitochondria	0.30637	0.694236	0.718532	0.722032	0.74483
	CREMI Synaptic Clefts	0	0.24241	0.25379	0.25887	0.26458
	Guay	0.34904	0.379514	0.37229	0.390852	0.403952
	*Kasthuri++	0.855477	0.906614	0.913079	0.912764	0.915339
	*Lucchi++	0.787761	0.89858	0.880279	0.89015	0.893772
	*Perez	0.546747	0.874362	0.854174	0.865839	0.868976
	UroCell	0.20834	0.63842	0.651815	0.69928	0.72887
	*Average Mouse Brain	0.729995	0.893185	0.882511	0.889584	0.892696
	Average Other	0.215937	0.488645	0.499107	0.517759	0.535558
