# Supplementary material for: CEM500K, a large-scale heterogeneous unlabeled cellular electron microscopy image dataset for deep learning
Source: eLife. 2021 Apr 8;10:e65894. doi: 10.7554/eLife.65894 (PMC8032397; doi:10.7554/eLife.65894)
Supplement: Figure 4—source data 1. [file elife-65894-fig4-data1.xlsx]

## Sheet: Figure4a_raw_unaveraged
benchmark	convname	iters	pretraining	Test_Set_IoU			Lookup Table
mito	All Mito.	10000	CEM500K-moco	0.761672			cremi	CREMI S.C.
mito	All Mito.	10000	CEM500K-moco	0.762155			mito	All Mito.
mito	All Mito.	10000	CEM500K-moco	0.769575			guay	Guay
mito	All Mito.	10000	CEM500K-moco	0.784583			perez_mito	Perez
mito	All Mito.	10000	CEM500K-moco	0.772246			perez_lyso	Perez
mito	All Mito.	10000	IN-moco	0.648773			perez_nuclei	Perez
mito	All Mito.	10000	IN-moco	0.650484			perez_nucleoli	Perez
mito	All Mito.	10000	IN-moco	0.650486			urocell	UroCell
mito	All Mito.	10000	IN-moco	0.653993			lucchi_pp	Lucchi++
mito	All Mito.	10000	IN-moco	0.6623			kasthuri_pp	Kasthuri++
mito	All Mito.	10000	IN-super	0.649528
mito	All Mito.	10000	IN-super	0.651843
mito	All Mito.	10000	IN-super	0.65417
mito	All Mito.	10000	IN-super	0.654891
mito	All Mito.	10000	IN-super	0.652908
mito	All Mito.	10000	Random Init.	0.584352
mito	All Mito.	10000	Random Init.	0.587225
mito	All Mito.	10000	Random Init.	0.588117
mito	All Mito.	10000	Random Init.	0.591379
mito	All Mito.	10000	Random Init.	0.586286
perez_nucleoli	Perez	2500	CEM500K-moco	0.888343
perez_nucleoli	Perez	2500	CEM500K-moco	0.886036
perez_nucleoli	Perez	2500	CEM500K-moco	0.885018
perez_nucleoli	Perez	2500	CEM500K-moco	0.884799
perez_nucleoli	Perez	2500	CEM500K-moco	0.87945
perez_nucleoli	Perez	2500	IN-moco	0.86721
perez_nucleoli	Perez	2500	IN-moco	0.866566
perez_nucleoli	Perez	2500	IN-moco	0.871179
perez_nucleoli	Perez	2500	IN-moco	0.871561
perez_nucleoli	Perez	2500	IN-moco	0.84726
perez_nucleoli	Perez	2500	IN-super	0.863108
perez_nucleoli	Perez	2500	IN-super	0.863692
perez_nucleoli	Perez	2500	IN-super	0.8609
perez_nucleoli	Perez	2500	IN-super	0.861132
perez_nucleoli	Perez	2500	IN-super	0.8457
perez_nucleoli	Perez	2500	Random Init.	0.685973
perez_nucleoli	Perez	2500	Random Init.	0.790871
perez_nucleoli	Perez	2500	Random Init.	0.792532
perez_nucleoli	Perez	2500	Random Init.	0.746991
perez_nucleoli	Perez	2500	Random Init.	0.63616
perez_nuclei	Perez	2500	CEM500K-moco	0.988407
perez_nuclei	Perez	2500	CEM500K-moco	0.988445
perez_nuclei	Perez	2500	CEM500K-moco	0.988107
perez_nuclei	Perez	2500	CEM500K-moco	0.98797
perez_nuclei	Perez	2500	CEM500K-moco	0.98897
perez_nuclei	Perez	2500	IN-moco	0.987093
perez_nuclei	Perez	2500	IN-moco	0.986136
perez_nuclei	Perez	2500	IN-moco	0.985183
perez_nuclei	Perez	2500	IN-moco	0.986644
perez_nuclei	Perez	2500	IN-moco	0.9849
perez_nuclei	Perez	2500	IN-super	0.988094
perez_nuclei	Perez	2500	IN-super	0.987675
perez_nuclei	Perez	2500	IN-super	0.988041
perez_nuclei	Perez	2500	IN-super	0.98794
perez_nuclei	Perez	2500	IN-super	0.98481
perez_nuclei	Perez	2500	Random Init.	0.985278
perez_nuclei	Perez	2500	Random Init.	0.985078
perez_nuclei	Perez	2500	Random Init.	0.984904
perez_nuclei	Perez	2500	Random Init.	0.979858
perez_nuclei	Perez	2500	Random Init.	0.98427
perez_mito	Perez	2500	CEM500K-moco	0.88346
perez_mito	Perez	2500	CEM500K-moco	0.8852
perez_mito	Perez	2500	CEM500K-moco	0.883876
perez_mito	Perez	2500	CEM500K-moco	0.885878
perez_mito	Perez	2500	CEM500K-moco	0.87952
perez_mito	Perez	2500	IN-moco	0.870911
perez_mito	Perez	2500	IN-moco	0.868906
perez_mito	Perez	2500	IN-moco	0.870518
perez_mito	Perez	2500	IN-moco	0.869619
perez_mito	Perez	2500	IN-moco	0.85227
perez_mito	Perez	2500	IN-super	0.865783
perez_mito	Perez	2500	IN-super	0.865619
perez_mito	Perez	2500	IN-super	0.866251
perez_mito	Perez	2500	IN-super	0.865571
perez_mito	Perez	2500	IN-super	0.83527
perez_mito	Perez	2500	Random Init.	0.103788
perez_mito	Perez	2500	Random Init.	7.70691e-10
perez_mito	Perez	2500	Random Init.	0.142422
perez_mito	Perez	2500	Random Init.	0.0316786
perez_mito	Perez	2500	Random Init.	0.37452
perez_lyso	Perez	2500	CEM500K-moco	0.847106
perez_lyso	Perez	2500	CEM500K-moco	0.848464
perez_lyso	Perez	2500	CEM500K-moco	0.829006
perez_lyso	Perez	2500	CEM500K-moco	0.851769
perez_lyso	Perez	2500	CEM500K-moco	0.86659
perez_lyso	Perez	2500	IN-moco	0.827463
perez_lyso	Perez	2500	IN-moco	0.818926
perez_lyso	Perez	2500	IN-moco	0.820589
perez_lyso	Perez	2500	IN-moco	0.821281
perez_lyso	Perez	2500	IN-moco	0.79136
perez_lyso	Perez	2500	IN-super	0.856967
perez_lyso	Perez	2500	IN-super	0.859371
perez_lyso	Perez	2500	IN-super	0.862314
perez_lyso	Perez	2500	IN-super	0.853841
perez_lyso	Perez	2500	IN-super	0.75762
perez_lyso	Perez	2500	Random Init.	0.841798
perez_lyso	Perez	2500	Random Init.	0.842795
perez_lyso	Perez	2500	Random Init.	0.840169
perez_lyso	Perez	2500	Random Init.	0.839047
perez_lyso	Perez	2500	Random Init.	0.84423
kasthuri_pp	Kasthuri++	10000	CEM500K-moco	0.911892
kasthuri_pp	Kasthuri++	10000	CEM500K-moco	0.913637
kasthuri_pp	Kasthuri++	10000	CEM500K-moco	0.913796
kasthuri_pp	Kasthuri++	10000	CEM500K-moco	0.914781
kasthuri_pp	Kasthuri++	10000	CEM500K-moco	0.91848
kasthuri_pp	Kasthuri++	10000	IN-moco	0.911185
kasthuri_pp	Kasthuri++	10000	IN-moco	0.910993
kasthuri_pp	Kasthuri++	10000	IN-moco	0.910342
kasthuri_pp	Kasthuri++	10000	IN-moco	0.911645
kasthuri_pp	Kasthuri++	10000	IN-moco	0.91022
kasthuri_pp	Kasthuri++	10000	IN-super	0.909676
kasthuri_pp	Kasthuri++	10000	IN-super	0.910657
kasthuri_pp	Kasthuri++	10000	IN-super	0.908736
kasthuri_pp	Kasthuri++	10000	IN-super	0.91022
kasthuri_pp	Kasthuri++	10000	IN-super	0.90272
kasthuri_pp	Kasthuri++	10000	Random Init.	0.907071
kasthuri_pp	Kasthuri++	10000	Random Init.	0.905385
kasthuri_pp	Kasthuri++	10000	Random Init.	0.904281
kasthuri_pp	Kasthuri++	10000	Random Init.	0.903766
kasthuri_pp	Kasthuri++	10000	Random Init.	0.90392
lucchi_pp	Lucchi++	10000	CEM500K-moco	0.893271
lucchi_pp	Lucchi++	10000	CEM500K-moco	0.889963
lucchi_pp	Lucchi++	10000	CEM500K-moco	0.89508
lucchi_pp	Lucchi++	10000	CEM500K-moco	0.894892
lucchi_pp	Lucchi++	10000	CEM500K-moco	0.89939
lucchi_pp	Lucchi++	10000	IN-moco	0.886887
lucchi_pp	Lucchi++	10000	IN-moco	0.887863
lucchi_pp	Lucchi++	10000	IN-moco	0.886118
lucchi_pp	Lucchi++	10000	IN-moco	0.888112
lucchi_pp	Lucchi++	10000	IN-moco	0.89214
lucchi_pp	Lucchi++	10000	IN-super	0.873988
lucchi_pp	Lucchi++	10000	IN-super	0.875192
lucchi_pp	Lucchi++	10000	IN-super	0.877559
lucchi_pp	Lucchi++	10000	IN-super	0.872154
lucchi_pp	Lucchi++	10000	IN-super	0.86482
lucchi_pp	Lucchi++	10000	Random Init.	0.889688
lucchi_pp	Lucchi++	10000	Random Init.	0.891985
lucchi_pp	Lucchi++	10000	Random Init.	0.892554
lucchi_pp	Lucchi++	10000	Random Init.	0.892185
lucchi_pp	Lucchi++	10000	Random Init.	0.89418
urocell	UroCell	2500	CEM500K-moco	0.713646
urocell	UroCell	2500	CEM500K-moco	0.719265
urocell	UroCell	2500	CEM500K-moco	0.7277
urocell	UroCell	2500	CEM500K-moco	0.728304
urocell	UroCell	2500	CEM500K-moco	0.782095
urocell	UroCell	2500	IN-moco	0.61809
urocell	UroCell	2500	IN-mocov2	0.587079
urocell	UroCell	2500	IN-mocov2	0.598322
urocell	UroCell	2500	IN-mocov2	0.600868
urocell	UroCell	2500	IN-mocov2	0.609198
urocell	UroCell	2500	IN-super	0.578294
urocell	UroCell	2500	IN-super	0.582552
urocell	UroCell	2500	IN-super	0.587936
urocell	UroCell	2500	IN-super	0.587967
urocell	UroCell	2500	IN-super	0.58437
urocell	UroCell	2500	Random Init.	0.399771
urocell	UroCell	2500	Random Init.	0.409049
urocell	UroCell	2500	Random Init.	0.412155
urocell	UroCell	2500	Random Init.	0.417497
urocell	UroCell	2500	Random Init.	0.479735
cremi	CREMI S.C.	5000	CEM500K-moco	0.234983
cremi	CREMI S.C.	5000	CEM500K-moco	0.259013
cremi	CREMI S.C.	5000	CEM500K-moco	0.256065
cremi	CREMI S.C.	5000	CEM500K-moco	0.259546
cremi	CREMI S.C.	5000	CEM500K-moco	0.25924
cremi	CREMI S.C.	5000	IN-moco	0.22577
cremi	CREMI S.C.	5000	IN-mocov2	0.232177
cremi	CREMI S.C.	5000	IN-mocov2	0.221426
cremi	CREMI S.C.	5000	IN-mocov2	0.231008
cremi	CREMI S.C.	5000	IN-mocov2	0.226159
cremi	CREMI S.C.	5000	IN-super	0.198559
cremi	CREMI S.C.	5000	IN-super	0.193557
cremi	CREMI S.C.	5000	IN-super	0.183132
cremi	CREMI S.C.	5000	IN-super	0.197542
cremi	CREMI S.C.	5000	IN-super	0.20646
cremi	CREMI S.C.	5000	Random Init.	0
cremi	CREMI S.C.	5000	Random Init.	0
cremi	CREMI S.C.	5000	Random Init.	0
cremi	CREMI S.C.	5000	Random Init.	0
cremi	CREMI S.C.	5000	Random Init.	0
guay	Guay	1000	CEM500K-moco	0.427843
guay	Guay	1000	CEM500K-moco	0.417004
guay	Guay	1000	CEM500K-moco	0.431578
guay	Guay	1000	CEM500K-moco	0.429044
guay	Guay	1000	CEM500K-moco	0.44125
guay	Guay	1000	IN-moco	0.300078
guay	Guay	1000	IN-mocov2	0.351856
guay	Guay	1000	IN-mocov2	0.339578
guay	Guay	1000	IN-mocov2	0.340821
guay	Guay	1000	IN-mocov2	0.340434
guay	Guay	1000	IN-super	0.278118
guay	Guay	1000	IN-super	0.278905
guay	Guay	1000	IN-super	0.273304
guay	Guay	1000	IN-super	0.269953
guay	Guay	1000	IN-super	0.276566
guay	Guay	1000	Random Init.	0.312008
guay	Guay	1000	Random Init.	0.321702
guay	Guay	1000	Random Init.	0.300772
guay	Guay	1000	Random Init.	0.293826
guay	Guay	1000	Random Init.	0.30958

## Sheet: Figure4a
Benchmark	Iterations	Initialization	IoU	Percent_Over_Random_Init
All Mito.	10000	Random Init.	0.587472	0
All Mito.	10000	IN-super	0.652668	0.110977
All Mito.	10000	IN-moco	0.653207	0.111895
All Mito.	10000	CEM500K-moco	0.770046	0.31078
CREMI S.C.	5000	Random Init.	0.2	0
CREMI S.C.	5000	IN-super	0.19585	-0.0207506
CREMI S.C.	5000	IN-moco	0.22577	0.12885
CREMI S.C.	5000	CEM500K-moco	0.253769	0.268846
Guay	1000	Random Init.	0.307578	0
Guay	1000	IN-super	0.275369	-0.104716
Guay	1000	IN-moco	0.300078	-0.0243829
Guay	1000	CEM500K-moco	0.429344	0.395888
Kasthuri++	10000	Random Init.	0.904885	0
Kasthuri++	10000	IN-super	0.908402	0.00388655
Kasthuri++	10000	IN-moco	0.910877	0.00662213
Kasthuri++	10000	CEM500K-moco	0.914517	0.0106447
Lucchi++	10000	Random Init.	0.892118	0
Lucchi++	10000	IN-super	0.872743	-0.0217189
Lucchi++	10000	IN-moco	0.888224	-0.00436513
Lucchi++	10000	CEM500K-moco	0.894519	0.00269119
Perez	2500	Random Init.	0.671618	0
Perez	2500	IN-super	0.885985	0.31918
Perez	2500	IN-moco	0.883279	0.31515
Perez	2500	CEM500K-moco	0.901321	0.342014
UroCell	2500	Random Init.	0.423641	0
UroCell	2500	IN-super	0.584224	0.379053
UroCell	2500	IN-moco	0.61809	0.458994
UroCell	2500	CEM500K-moco	0.734202	0.733075

## Sheet: Table2
	Benchmark	Training Iterations	Random Init.	IN-super	IN-moco	CEM500K-moco	Reported
	All Mitochondria	10000	0.58747	0.652668	0.653207	0.770046	--
	CREMI Synaptic Clefts	5000	0	0.19585	0.2257	0.253769	--
	Guay [15]	1000	0.307578	0.275369	0.300078	0.429344	0.417
	Kasthuri++ [17]	10000	0.904885	0.908402	0.910877	0.914517	0.845
	Lucchi++ [17]	10000	0.894	0.865	0.892	0.894519	0.888
	Perez [18]	2500	0.671618	0.885985	0.883279	0.901321	0.82075
	Lysosomes	--	0.841608	0.838023	0.815924	0.848587	0.726
	Mitochondria	--	0.130482	0.859699	0.866445	0.883587	0.78
	Nuclei	--	0.983878	0.987312	0.985991	0.98838	0.942
	Nucleoli	--	0.730505	0.858906	0.864755	0.884729	0.835
	UroCell	2500	0.423641	0.584224	0.61809	0.734202	--
