# Supplementary material for: CEM500K, a large-scale heterogeneous unlabeled cellular electron microscopy image dataset for deep learning
Source: eLife. 2021 Apr 8;10:e65894. doi: 10.7554/eLife.65894 (PMC8032397; doi:10.7554/eLife.65894)
Supplement: Figure 4—source data 2. [file elife-65894-fig4-data2.xlsx]

## Sheet: Fig4d_unaveraged_raw
Benchmark	Initialization	Iterations	IoU	Performance_at_10000_Iters	Percent_of_10000_Iters
All Mito.	CEM500K-moco	100	0.519338	0.772246	0.672503
All Mito.	CEM500K-moco	500	0.609944	0.772246	0.789831
All Mito.	CEM500K-moco	1000	0.678172	0.772246	0.878181
All Mito.	CEM500K-moco	2500	0.71638	0.772246	0.927658
All Mito.	CEM500K-moco	5000	0.7552	0.772246	0.977927
All Mito.	CEM500K-moco	10000	0.772246	0.772246	1
All Mito.	IN-moco	100	0.41461	0.6623	0.626015
All Mito.	IN-moco	500	0.535064	0.6623	0.807888
All Mito.	IN-moco	1000	0.553976	0.6623	0.836443
All Mito.	IN-moco	2500	0.624794	0.6623	0.94337
All Mito.	IN-moco	5000	0.644854	0.6623	0.973658
All Mito.	IN-moco	10000	0.6623	0.6623	1
All Mito.	IN-super	100	0.352874	0.652908	0.540465
All Mito.	IN-super	500	0.432426	0.652908	0.662308
All Mito.	IN-super	1000	0.462416	0.652908	0.708241
All Mito.	IN-super	2500	0.57366	0.652908	0.878623
All Mito.	IN-super	5000	0.619476	0.652908	0.948795
All Mito.	IN-super	10000	0.652908	0.652908	1
All Mito.	Random Init.	100	0.004928	0.5982	0.00823805
All Mito.	Random Init.	500	0.270696	0.5982	0.452518
All Mito.	Random Init.	1000	0.368792	0.5982	0.616503
All Mito.	Random Init.	2500	0.407186	0.5982	0.680685
All Mito.	Random Init.	5000	0.536354	0.5982	0.896613
All Mito.	Random Init.	10000	0.586286	0.5982	0.980084
All Mito.	Random Init.	30000	0.5982	0.5982	1
CREMI S.C.	CEM500K-moco	100	0	0.25924	0
CREMI S.C.	CEM500K-moco	500	0.06458	0.25924	0.249113
CREMI S.C.	CEM500K-moco	1000	0.15317	0.25924	0.590842
CREMI S.C.	CEM500K-moco	2500	0.25296	0.25924	0.975775
CREMI S.C.	CEM500K-moco	5000	0.25924	0.25924	1
CREMI S.C.	CEM500K-moco	10000	0.25617	0.25924	0.988158
CREMI S.C.	IN-moco	100	0	0.23622	0
CREMI S.C.	IN-moco	500	0.06507	0.23622	0.275464
CREMI S.C.	IN-moco	1000	0.12254	0.23622	0.518754
CREMI S.C.	IN-moco	2500	0.20694	0.23622	0.876048
CREMI S.C.	IN-moco	5000	0.22577	0.23622	0.955762
CREMI S.C.	IN-moco	10000	0.23622	0.23622	1
CREMI S.C.	IN-super	100	0	0.25315	0
CREMI S.C.	IN-super	500	0.00356	0.25315	0.0140628
CREMI S.C.	IN-super	1000	5e-05	0.25315	0.000197511
CREMI S.C.	IN-super	2500	0.1353	0.25315	0.534466
CREMI S.C.	IN-super	5000	0.20646	0.25315	0.815564
CREMI S.C.	IN-super	10000	0.25315	0.25315	1
CREMI S.C.	Random Init.	100	0	0.27926	0
CREMI S.C.	Random Init.	500	0	0.27926	0
CREMI S.C.	Random Init.	1000	0	0.27926	0
CREMI S.C.	Random Init.	2500	0.00024	0.27926	0.000859414
CREMI S.C.	Random Init.	5000	0.2	0.27926	0.716178
CREMI S.C.	Random Init.	10000	0	0.27926	0
CREMI S.C.	Random Init.	30000	0.27926	0.27926	1
Guay	CEM500K-moco	100	0.273004	0.44125	0.618706
Guay	CEM500K-moco	500	0.4356	0.44125	0.987195
Guay	CEM500K-moco	1000	0.44125	0.44125	1
Guay	CEM500K-moco	2500	0.429304	0.44125	0.972927
Guay	CEM500K-moco	5000	0.395644	0.44125	0.896644
Guay	CEM500K-moco	10000	0.39993	0.44125	0.906357
Guay	IN-moco	100	0.25021	0.320754	0.780068
Guay	IN-moco	500	0.320754	0.320754	1
Guay	IN-moco	1000	0.300078	0.320754	0.935539
Guay	IN-moco	2500	0.30769	0.320754	0.959271
Guay	IN-moco	5000	0.31695	0.320754	0.98814
Guay	IN-moco	10000	0.298676	0.320754	0.931168
Guay	IN-super	100	0.109818	0.28875	0.380322
Guay	IN-super	500	0.24531	0.28875	0.849558
Guay	IN-super	1000	0.276566	0.28875	0.957804
Guay	IN-super	2500	0.284936	0.28875	0.986791
Guay	IN-super	5000	0.28875	0.28875	1
Guay	IN-super	10000	0.267328	0.28875	0.925811
Guay	Random Init.	100	0.064682	0.44721	0.144635
Guay	Random Init.	500	0.241244	0.44721	0.539442
Guay	Random Init.	1000	0.30958	0.44721	0.692247
Guay	Random Init.	2500	0.408818	0.44721	0.914152
Guay	Random Init.	5000	0.44721	0.44721	1
Guay	Random Init.	10000	0.384928	0.44721	0.860732
Guay	Random Init.	30000	0.3676	0.44721	0.821985
Kasthuri++	CEM500K-moco	100	0.84633	0.91848	0.921446
Kasthuri++	CEM500K-moco	500	0.89355	0.91848	0.972857
Kasthuri++	CEM500K-moco	1000	0.90393	0.91848	0.984159
Kasthuri++	CEM500K-moco	2500	0.90836	0.91848	0.988982
Kasthuri++	CEM500K-moco	5000	0.91615	0.91848	0.997463
Kasthuri++	CEM500K-moco	10000	0.91848	0.91848	1
Kasthuri++	IN-moco	100	0.81162	0.91244	0.889505
Kasthuri++	IN-moco	500	0.87429	0.91244	0.958189
Kasthuri++	IN-moco	1000	0.89165	0.91244	0.977215
Kasthuri++	IN-moco	2500	0.9006	0.91244	0.987024
Kasthuri++	IN-moco	5000	0.91244	0.91244	1
Kasthuri++	IN-moco	10000	0.91022	0.91244	0.997567
Kasthuri++	IN-super	100	0.76423	0.90272	0.846586
Kasthuri++	IN-super	500	0.86581	0.90272	0.959112
Kasthuri++	IN-super	1000	0.88037	0.90272	0.975241
Kasthuri++	IN-super	2500	0.89313	0.90272	0.989377
Kasthuri++	IN-super	5000	0.90142	0.90272	0.99856
Kasthuri++	IN-super	10000	0.90272	0.90272	1
Kasthuri++	Random Init.	100	0.12087	0.90991	0.132837
Kasthuri++	Random Init.	500	0.8332	0.90991	0.915695
Kasthuri++	Random Init.	1000	0.86428	0.90991	0.949852
Kasthuri++	Random Init.	2500	0.88333	0.90991	0.970788
Kasthuri++	Random Init.	5000	0.89731	0.90991	0.986152
Kasthuri++	Random Init.	10000	0.90392	0.90991	0.993417
Kasthuri++	Random Init.	30000	0.90991	0.90991	1
Lucchi++	CEM500K-moco	100	0.84372	0.89939	0.938102
Lucchi++	CEM500K-moco	500	0.87791	0.89939	0.976117
Lucchi++	CEM500K-moco	1000	0.88865	0.89939	0.988059
Lucchi++	CEM500K-moco	2500	0.89389	0.89939	0.993885
Lucchi++	CEM500K-moco	5000	0.89501	0.89939	0.99513
Lucchi++	CEM500K-moco	10000	0.89939	0.89939	1
Lucchi++	IN-moco	100	0.81353	0.89214	0.911886
Lucchi++	IN-moco	500	0.87152	0.89214	0.976887
Lucchi++	IN-moco	1000	0.88039	0.89214	0.986829
Lucchi++	IN-moco	2500	0.88459	0.89214	0.991537
Lucchi++	IN-moco	5000	0.88271	0.89214	0.98943
Lucchi++	IN-moco	10000	0.89214	0.89214	1
Lucchi++	IN-super	100	0.74558	0.86866	0.858311
Lucchi++	IN-super	500	0.83424	0.86866	0.960376
Lucchi++	IN-super	1000	0.86025	0.86866	0.990318
Lucchi++	IN-super	2500	0.86866	0.86866	1
Lucchi++	IN-super	5000	0.86532	0.86866	0.996155
Lucchi++	IN-super	10000	0.86482	0.86866	0.995579
Lucchi++	Random Init.	100	0.4978	0.8946	0.55645
Lucchi++	Random Init.	500	0.84324	0.8946	0.942589
Lucchi++	Random Init.	1000	0.85907	0.8946	0.960284
Lucchi++	Random Init.	2500	0.87847	0.8946	0.98197
Lucchi++	Random Init.	5000	0.88091	0.8946	0.984697
Lucchi++	Random Init.	10000	0.89418	0.8946	0.999531
Lucchi++	Random Init.	30000	0.8946	0.8946	1
Perez	CEM500K-moco	100	0.84638	0.903632	0.936642
Perez	CEM500K-moco	500	0.883637	0.903632	0.977873
Perez	CEM500K-moco	1000	0.889447	0.903632	0.984302
Perez	CEM500K-moco	2500	0.903632	0.903632	1
Perez	CEM500K-moco	5000	0.901678	0.903632	0.997837
Perez	CEM500K-moco	10000	0.900932	0.903632	0.997012
Perez	IN-moco	100	0.75668	0.868947	0.870801
Perez	IN-moco	500	0.84189	0.868947	0.968862
Perez	IN-moco	1000	0.85658	0.868947	0.985767
Perez	IN-moco	2500	0.868947	0.868947	1
Perez	IN-moco	5000	0.866358	0.868947	0.997019
Perez	IN-moco	10000	0.863492	0.868947	0.993722
Perez	IN-super	100	0.617745	0.876735	0.704597
Perez	IN-super	500	0.769282	0.876735	0.87744
Perez	IN-super	1000	0.824303	0.876735	0.940196
Perez	IN-super	2500	0.85585	0.876735	0.976179
Perez	IN-super	5000	0.873082	0.876735	0.995834
Perez	IN-super	10000	0.876735	0.876735	1
Perez	Random Init.	100	0.173435	0.906115	0.191405
Perez	Random Init.	500	0.24127	0.906115	0.266269
Perez	Random Init.	1000	0.4836	0.906115	0.533707
Perez	Random Init.	2500	0.709795	0.906115	0.783339
Perez	Random Init.	5000	0.73113	0.906115	0.806884
Perez	Random Init.	10000	0.8918	0.906115	0.984202
Perez	Random Init.	30000	0.906115	0.906115	1
UroCell	CEM500K-moco	100	0.677765	0.782095	0.866602
UroCell	CEM500K-moco	500	0.73485	0.782095	0.939592
UroCell	CEM500K-moco	1000	0.73771	0.782095	0.943249
UroCell	CEM500K-moco	2500	0.782095	0.782095	1
UroCell	CEM500K-moco	5000	0.766155	0.782095	0.979619
UroCell	CEM500K-moco	10000	0.747045	0.782095	0.955184
UroCell	IN-moco	100	0.618905	0.686125	0.90203
UroCell	IN-moco	500	0.638205	0.686125	0.930158
UroCell	IN-moco	1000	0.651915	0.686125	0.95014
UroCell	IN-moco	2500	0.61809	0.686125	0.900842
UroCell	IN-moco	5000	0.659485	0.686125	0.961173
UroCell	IN-moco	10000	0.686125	0.686125	1
UroCell	IN-super	100	0.2666	0.721665	0.369423
UroCell	IN-super	500	0.57554	0.721665	0.797517
UroCell	IN-super	1000	0.54841	0.721665	0.759923
UroCell	IN-super	2500	0.58437	0.721665	0.809752
UroCell	IN-super	5000	0.660225	0.721665	0.914864
UroCell	IN-super	10000	0.721665	0.721665	1
UroCell	Random Init.	100	0.194275	0.6015	0.322984
UroCell	Random Init.	500	0.21017	0.6015	0.34941
UroCell	Random Init.	1000	0.349985	0.6015	0.581854
UroCell	Random Init.	2500	0.479735	0.6015	0.797564
UroCell	Random Init.	5000	0.522195	0.6015	0.868155
UroCell	Random Init.	10000	0.55989	0.6015	0.930823
UroCell	Random Init.	30000	0.6015	0.6015	1

## Sheet: Fig4d
Initialization	Iterations	Iter_Frac	IoU	Percent
CEM500K-moco	100	0.01	0.572362	0.818631
IN-moco	100	0.01	0.523651	0.805763
IN-super	100	0.01	0.408121	0.629355
Random Init.	100	0.01	0.150856	0.250175
CEM500K-moco	500	0.05	0.642867	0.919472
IN-moco	500	0.05	0.592399	0.911549
IN-super	500	0.05	0.53231	0.820864
Random Init.	500	0.05	0.377117	0.625401
CEM500K-moco	1000	0.1	0.670333	0.958754
IN-moco	1000	0.1	0.608161	0.935803
IN-super	1000	0.1	0.550338	0.848664
Random Init.	1000	0.1	0.462187	0.766478
CEM500K-moco	2500	0.25	0.698089	0.998453
IN-moco	2500	0.25	0.630236	0.96977
IN-super	2500	0.25	0.599415	0.924346
Random Init.	2500	0.25	0.538225	0.892578
CEM500K-moco	5000	0.5	0.69844	0.998954
IN-moco	5000	0.5	0.644081	0.991074
IN-super	5000	0.5	0.630676	0.972553
Random Init.	5000	0.5	0.602158	0.998603
CEM500K-moco	10000	1	0.69917	1
IN-moco	10000	1	0.649882	1
IN-super	10000	1	0.648475	1
Random Init.	10000	1	0.603001	1
